# Supplementary material
Source: PubMed Central journal article supplement (PMC6014698)
Supplement: NIHMS973429-supplement-Support-Info.pdf [file NIHMS973429-supplement-Support-Info.pdf]

# CHEMISTRY

## A **European** Journal

### Supporting Information

#### **Vortex Fluidic Chemical Transformations**

Joshua Britton,<sup>[a, b]</sup> Keith A. Stubbs,<sup>[c]</sup> Gregory A. Weiss,<sup>\*[a]</sup> and Colin L. Raston<sup>\*[b]</sup>

chem\_201700888\_sm\_miscellaneous\_information.pdf  
chem\_201700888\_sm\_Shorter\_VideoS3.mp4  
chem\_201700888\_sm\_Video\_S1.mov  
chem\_201700888\_sm\_Video\_S2.mov

## Enlarged Photographs of Faraday waves

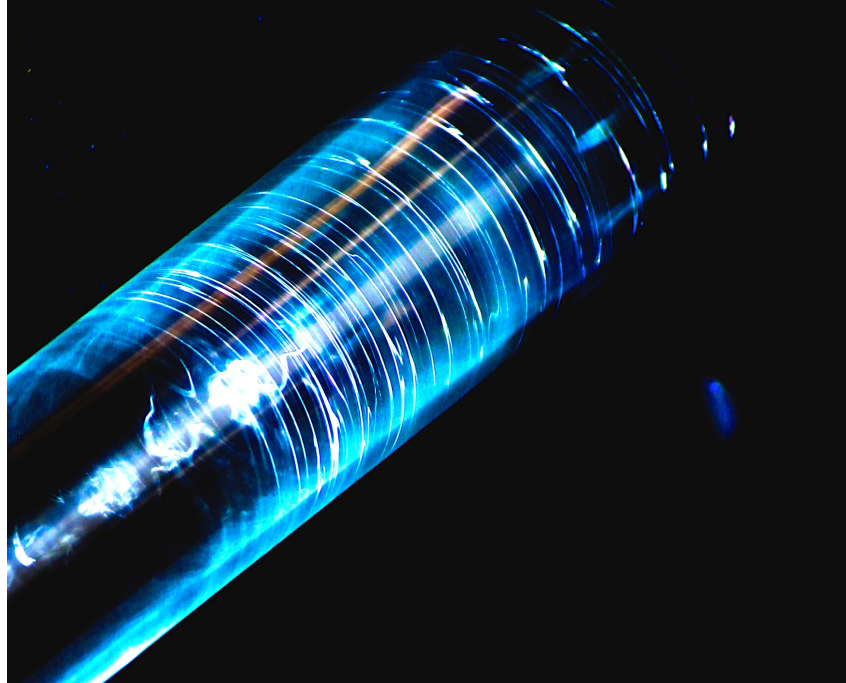

**Figure S1** A photograph of Faraday waves present in the VFD. The contrast of the image has been adjusted to enhance clarity.

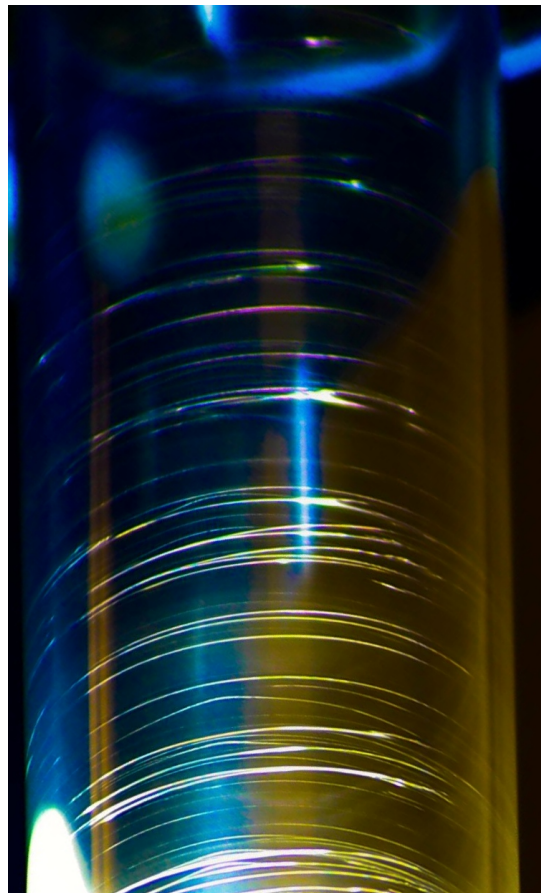

**Figure S2** An enlarged longitudinal photograph of a Faraday wave present in the VFD. The contrast of the image has been adjusted to enhance clarity of the waves.

## Enlarged Schemes from Figure 2 in the Manuscript

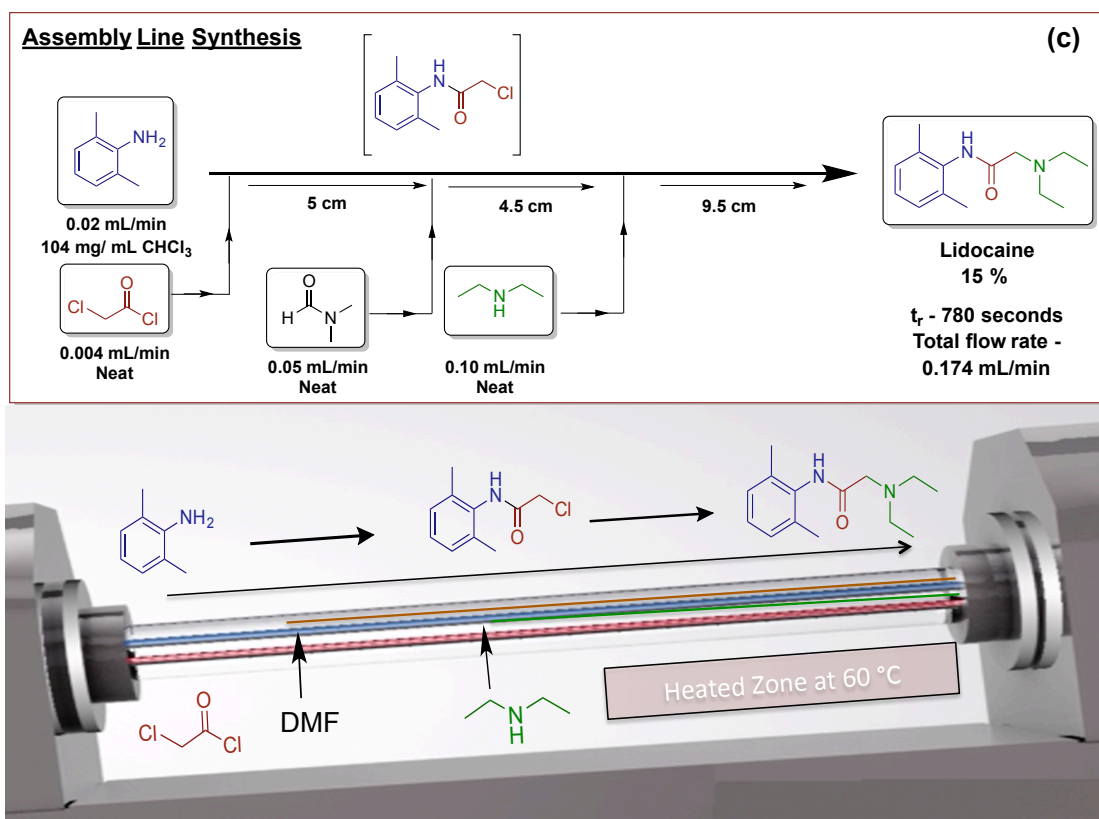

Figure S3 An enlarged version of the image found in Figure 2D.

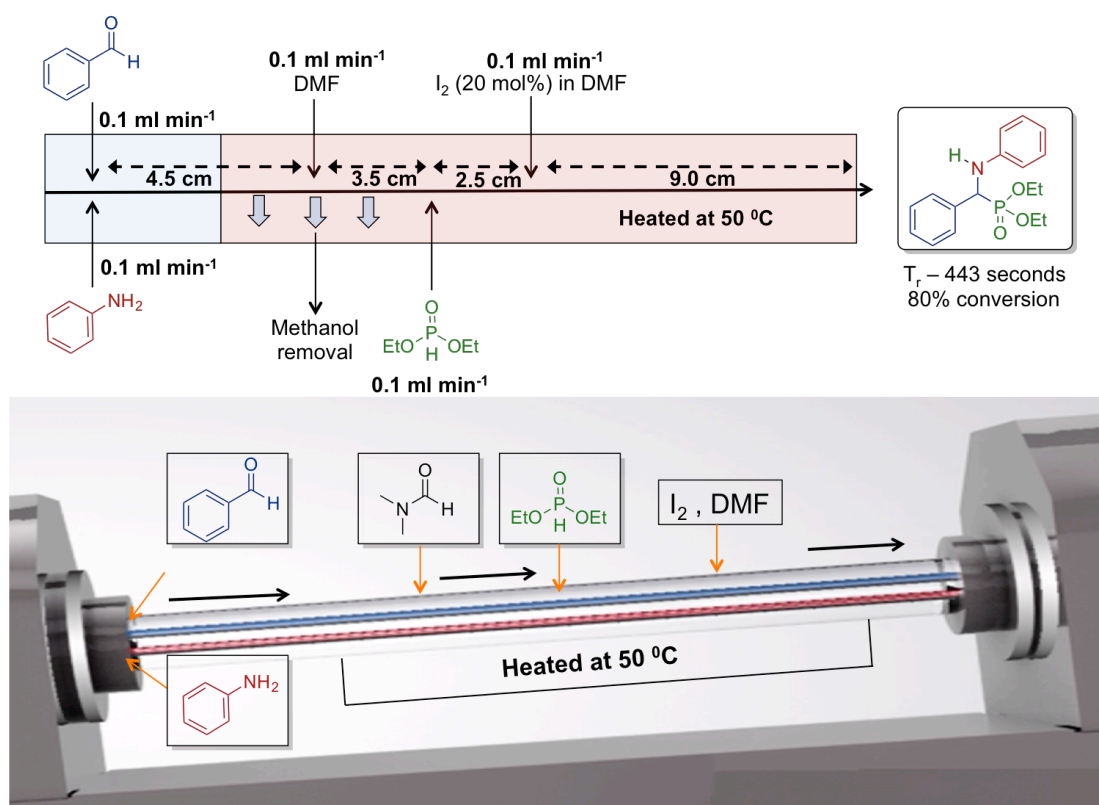

Figure S4 An enlarged version of the image found in Figure 2D.
